# Supplementary material for: Reduced iNKT cells numbers in type 1 diabetes patients and their first‐degree relatives
Source: PubMed Central journal article supplement (PMC4693717; doi:10.1002/iid3.79), 2015-08-18

**A**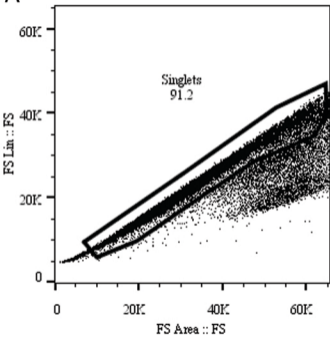**B**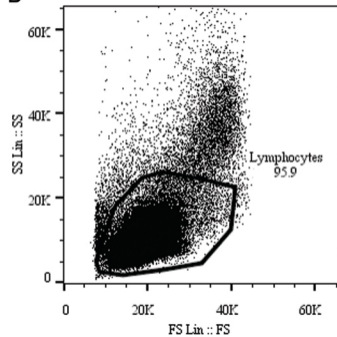**C**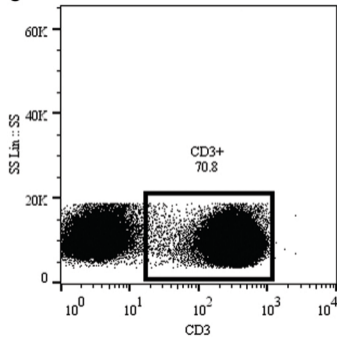**D**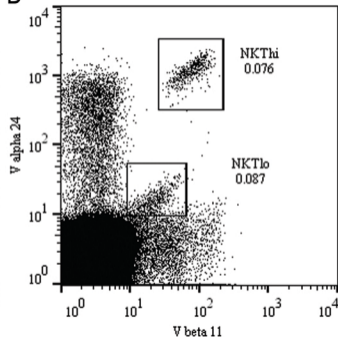

Supplement: IID3-3-411-s001.pdf [file IID3-3-411-s001.pdf]
